# Supplementary material for: The Impact on Greenhouse Gas Emissions of Rice Crop Management Under the System of Rice Intensification: A Review
Source: Preprints.org preprint supplement (doi:10.20944/preprints202310.1922.v1), 2023-11-01
Supplement: Supplementary file 1 [file supplementary]

## Sheet: Notes
Abbreviations and assumptions
AWD	Alternate wetting and drying
CH4	Methane
CO2	Carbon dioxide
CO2e	Carbon dioxide equivalent GHG emissions
CRC	Conventional rice cultivation with flooded fields)
GHG	Greenhouse gas
N2O	Nitrous oxide
SRI	System of Rice Intensification
Global Warming Potentials
Methane (CH4)	27
Nitrous oxide (N2O)	273
Source:
Forster, P. et al. The Earth’s Energy Budget, Climate Feedbacks and Climate Sensitivity. in Climate Change 2021 – The Physical Science Basis: Working Group I Contribution to the Sixth Assessment Report of the Intergovernmental Panel on Climate Change (ed. Intergovernmental Panel on Climate Change (IPCC)) 923–1054 (Cambridge University Press, 2021). doi:10.1017/9781009157896.009. Table 7.15, p. 10…

## Sheet: T1. SRI vs CRC
					Methane (kg/ha)		Nitrous oxide (kg/ha)		Net GHG (CO2e kg/ha)		Yield (t/ha)		GHG intensity (t CO2e/t rice)		𝚫 from CRC to SRI (%)
Source Title	Place/date	Source (DOI/Link)	Reference	Gases reported	CRC	SRI	CRC	SRI	CRC	SRI	CRC	SRI	CRC	SRI	CO2e/ha	GHG/t rice	Yield	Cultivation Methods Investigated	Emissions Change (per hectare)	Yield Changes	Emissions change (per kilogram of rice produced)	Data Location	Notes	Extra Calculations
System of Rice Intensification: An analysis of adoption and potential environmental benefits	Nepal (2011)	https://nmbu.brage.unit.no/nmbu-xmlui/handle/11250/187733	Karki	CH4, N2O	4.72	1.25	3.25	0.83	1014.69	260.34	2.75	6	368.978	43.39	-0.743429	-0.882405	1.18182	Conventional and AWD	84.3% decrease in seasonal Carbon Dioxide equivalent emissions	8.5% reduction in yields.	82.8% reduction in Carbon Dioxide equivalent emissions per kg of rice produced.	pp. 73, 15	GHG data in seasonal GWP. Calculations > emissions > GWP.	Conventional N2O: (94 / 289) *10 = 3.25	Conventional CH4: (34 /72) * 10 = 4.72	SRI N2O: (24 / 289) * 10 = 0.83	SRI CH4: (9 / 72) * 10 = 1.25
Pattern of methane emission and water productivity under different methods of rice crop establishment	India (2013)	https://doi.org/10.1007/s10333-012-0323-5	Suryavanshi	CH4, N2O	32.33	19.93			872.91	538.11	4.53	5.03	192.695	106.98	-0.383545	-0.444823	0.110375	Conventional and AWD	57–74% in annual Carbon Dioxide equivalent emissions	Average increase of 5.1%	59–88% reduction in growing season Carbon Dioxide Equivalent emissions per kg of rice produced.
Methane emission patterns and their associated soil microflora with SRI and conventional systems of rice cultivation in Tamil Nadu, India.	India (2013)	N/A - https://www.researchgate.net/publication/285964759_Methane_emission_patterns_and_their_associated_soil_microflora_with_SRI_and_conventional_systems_of_rice_cultivation_in_Tamil_Nadu_India	Rajkishore	CH4	50.05	34.75			1351.35	938.25			n/a	n/a	-0.305694	n/a	n/a							Conventional methane: (44.6+55.5)/2 = 50.05	SRi methane: (31.8 + 37.7)/2 = 34.75
Mitigation of greenhouse gas emission with system of rice intensification in the Indo-Gangetic Plains	India (2014)	https://doi.org/10.1007/s10333-013-0390-2	Jain	CH4, N2O	22.59	8.49	0.61	0.9	776.46	474.93	5.88	5.69	132.051	83.4675	-0.388339	-0.367915	-0.0323129	Conventional and AWD	24% reduction in Carbon Dioxide equivalent seasonal emissions	9.1% reduction in yield	Reduction of 15.4% in growing season Carbon Dioxide equivalent emissions per kg of rice produced.	Tables 1, 2	TPR used for conventional, averages calculated for SRI for SRI and MSRI.	SRI CH4: (8.81 + 8.16) / 2 = 8.49	SRI N2O: (0.91 + 0.89) / 2 = 0.9	SRI yield: ( 5.62 + 5.75) / 2 = 5.69
Sobering Rice Production from Conventional to Climate Smart	India (2017)	https://doi.org/10.20546/ijcmas.2017.609.345	Rajesh Krishnan	CH4, N2O, CO2	61.69	34.41	0.3317	0.3408	1756.18	1022.11	3.25	4.92	540.364	207.746	-0.417995	-0.615545	0.513846	Conventional and AWD	38.5% reduction in Carbon Dioxide equivalent emissions per season	9.9% increase in yield	44.1% reduction in Carbon Dioxide equivalent emissions per kg of rice produced
Evaluation of rice cultivation systems for greenhouse gases emission and productivity	India (2020)	https://www.researchgate.net/publication/342347798_Evaluation_of_rice_cultivation_systems_for_greenhouse_gases_emission_and_productivity	Ramesh	CH4, N2O	5.19	3.84	1.54	1.65	560.55	554.13	5.3	5.86	105.764	94.5614	-0.011453	-0.105922	0.10566	Conventional and AWD	26.7% reduction in Carbon Dioxide equivalent emissions.	7.1% increase with AWD	31.6% reduction in Carbon Dioxide equivalent emissions per kg of rice produced		Daily values averaged for CRC and SRI.	Conventional CH4: (5.23+4.21+8.2+3.1)/4 = 5.19	Conventional N2O: (2.04+1.64+1.45+1.03)/4 = 1.54	SRI CH4: (4.08 + 3.22 + 6.05 + 2) / 4 = 3.84	SRI N2O: (2.42 + 1.71 + 1.69 + 0.78) / 4 = 1.65
Carbon sequestration and greenhouse gas emissions for different rice cultivation practices	India (2022)	https://doi.org/10.1016/j.spc.2022.09.001	Gangopadhyay	CH4, N2O	85.33	55.94	1.51	1.92	2716.14	2034.54	5.4	12.25	502.989	166.085	-0.250944	-0.669804	1.26852					Supp tables		Conventional CH4: (70.40 + 80.56 + 62.04 + 90.56 + 76.90 + 70.29 + 78.12 + 89.60 + 70.42 + 109.69 + 94.93 + 88.87 + 145.24 + 66.48 + 65.00 + 125.83 + 66.41 + 55.29 + 82.31 + 80.35 + 43.70 + 163.76 + 99.30 + 88.06) / 24 = 85.33	Conventional N2O: (0.33 + 2.08 + 1.07 + 1.45 + 1.62 + 1.40 + 1.50 + 1.72 + 1.47 + 1.42 + 1.95 + 1.55 + 1.26 + 1.71 + 1.36 + 1.71 + 1.56 + 1.50 + 1.64 + 1.60 + 1.40 + 1.26 + 1.62 + 1.31) / 24 = 1.51	SRI CH4: (72.88 + 69.51 + 57.76 + 69.16 + 59.20 + 51.44 + 64.82 + 53.47 + 45.70 + 64.17 + 52.33 + 58.26 + 95.78 + 54.08 + 46.29 + 64.14 + 46.61 + 32.78 + 47.57 + 50.77 + 37.04 + 54.54 + 49.52 + 33.71) / 24 = 55.94	SRI N2O: (1.53 + 2.02 + 1.64 + 1.70 + 2.00 + 1.72 + 1.57 + 2.02 + 1.66 + 1.58 + 2.21 + 1.76 + 1.76 + 2.35 + 1.93 + 2.27 + 2.00 + 2.00 + 1.91 + 1.90 + 1.77 + 2.47 + 1.99 + 2.10) / 24 = 1.92	Yield conventional: (3.01 + 3.98 + 4.36 + 3.25 + 6.73 + 7.89 + 3.09 + 3.34 + 6.99 + 6.24 + 4.43 + 5.31 + 3.45 + 3.42 + 7.90 + 5.30 + 5.16 + 12.43 + 5.65 + 4.82 + 8.95 + 5.42 + 3.00 + 6.57) / 24 = 5.40	Yield SRI: (12.14 + 4.57 + 14.69 + 11.10 + 13.88 + 6.68 + 12.44 + 5.66 + 12.47 + 6.75 + 7.74 + 11.81 + 14.11 + 16.56 + 17.69 + 10.28 + 12.76 + 19.06 + 18.52 + 10.44 + 16.41 + 7.20 + 11.83 + 7.69) / 24 = 12.25
A new methodological approach to the establishment of sustainable agricultural ecology in drought vulnerable areas of eastern India	India (2023)	https://doi.org/10.1016/j.ecoinf.2023.102013	Gangopadhyay	CH4, N2O	102.3	64.94	1.48	2.02	3166.14	2304.84	4.4	11	719.577	209.531	-0.272035	-0.708814	1.5					Tables 3, 4, Supp	Averaged across season, year and variety.	Conventional CH4: ((83.33+81.79+79.10+96.96+96.58+89.38+95.04+94.18+88.30+114.72+105.98+105.98)+(116.45+111.84+111.84+108.38+102.91+97.44+90.82+86.78+82.75+149.47+138.24+127.01))/24 = 102.30	Conventional N2O: ((1.45+1.49+1.41+1.58+ 1.51+1.38+1.44+1.56+1.32+1.44+1.61+1.26) + (1.16+1.2+1.11+1.73+1.85+1.59+1.7+1.76+1.33+1.44+1.62+1.64)) /24 = 1.48	SRI CH4: ((78.62+75.36+71.90+73.06+70.18+66.14+68.16+64.70+61.25+65.57+63.17+59.88)+(84+74.59+77.18+61.34+60.10+57.60+54.24+52.99+51.55+56.83+55.39+54.82))/24 = 64.94	SRI N2O: ((2.03+2.21+1.86+1.99+2.16+1.81+2.02+2.07+1.96+2.3+2.45+2.16)+(1.93+1.88+1.73+1.99+2.19+2.15+1.94+1.96+1.80+2.09+1.98+1.87))/24 = 2.02	Yield conventional (3.15+2.78+3.13+4.46+3.52+3.23+3.43+5.2+3.82+3.69+3.76+6.09+4.52+4.62+4.67+3.65+4.97+5.36+5.25+4.27+5.46+6.02+5.78+4.73)/24 = 4.40	Yield SRI: (7.87+8.77+13.44+13.49+8.31+9.09+15.33+14.46+8.88+9.3+17.23+15.47+11.94+6.59+10.84+8.7+12.4+7.23+11.57+9.54+13.08+7.96+12.22+10.3)/24 = 11.00
								Median	1183.02	746.19	4.53	5.86	368.978	106.98	-0.34462	-0.615545	0.513846
								Mean	1526.8	1015.91	4.50143	7.25	366.06	130.251	-0.346679	-0.542175	0.663987
								Max	3166.14	2304.84	5.88	12.25	719.577	209.531	-0.011453	-0.105922	1.5
								Min	560.55	260.34	2.75	4.92	105.764	43.39	-0.743429	-0.882405	-0.0323129

## Sheet: T2. AWD vs CRC 
					Methane (kg/ha)		Nitrous oxide (kg/ha)		Net GHG (CO2e kg/ha)		Yield (t/ha)		GHG intensity (t CO2e/t rice)		𝚫 from CRC to AWD (%)
Source Title	Place/date	Source (DOI/Link)	Lead author	Gases reported	CRC	AWD	CRC	AWD	CRC	AWD	CRC	AWD	CRC	AWD	CO2e/ha	GHG/t rice	Yield	Cultivation Methods Investigated	Emissions Change (per hectare)	Yield Changes	Emissions change (per kilogram of rice produced)	Data Location	Notes	Extra Calculations
Methane and nitrous oxide emissions from paddy field as affected by water-saving irrigation	China (2012)	https://doi.org/10.1016/j.pce.2011.08.020	Yang	CH4, N2O	70.1	18.8	9.64	10.7	4524.42	3428.7	7.85	8.06	576.359	425.397	-0.242179	-0.261924	0.0267516	Conventional and Controlled Irrigation (AWD)	61.4% reduction in Carbon Dioxide equivalent seasonal emissions	No significant change in yield	No change in yield, so reduction in emissions per kg of rice produced of 61.4% with AWD.	Table 4 and 5	AWD not named but inferred from experiment design. Data from 2007. N2O not in 2006 data. Conversion from G/m2 > kg/ha = x10.
Effect of intermittent drainage on methane and nitrous oxide emissions under different fertilization in a temperate paddy soil during rice cultivation	Korea (2014)	https://doi.org/10.1007/s13765-013-4298-8	Kim	CH4, N2O	378.63	191.1	0.57	0.76	10378.6	5367.18	5.47	5.55	1897.37	967.059	-0.482862	-0.490316	0.0146252	Conventional and AWD	47.9% reduction in Carbon Dioxide equivalent emissions	1.5% increase with AWD	49.1% reduction in Carbon Dioxide equivalent emissions per kg of rice produced	Table 1	Averaged across fertilisation methods.	Conventional CH4: (192+321.7+622.2)/3= 378.63	Conventional N2O: (0.31+0.64+0.77)/3 = 0.57	AWD CH4: (90.7 + 181.7 + 300.9) / 3 = 191.1	AWD N2O: (0.36 + 0.82 + 1.1) / 3 = 0.76	Yield AWD: (4646 + 5694 + 6312) / 3 = 5550.67kg	Yield conventional: (4605 + 5525 + 6276) / 3 = 5468.67kg
Reducing greenhouse gas emissions, water use, and grain arsenic levels in rice systems	USA (2015)	https://doi.org/10.1111/gcb.12701	Linquist	CH4, N2O	105	7.31	0.031	0.3905	2843.46	303.976	10.26	9.35	277.141	32.5109	-0.893096	-0.882692	-0.088694	Conventional and AWD	84.3% decrease in seasonal Carbon Dioxide equivalent emissions	8.5% reduction in yields.	82.8% reduction in Carbon Dioxide equivalent emissions per kg of rice produced.	Table 1 and 2	AWD/40 - Flood was exlcuded from AWD calculations as too similar to continuous flooding practices.	Conventional CH4: (71 + 100 + 144) / 3 = 105	Conventional N2O: (0.031 + 0.07 + -0.008) / 3 = 0.031	AWD CH4: (2.8 + 1.7 + 6.04 + 7.8 + 11.8 + 13.7) / 6 = 7.31	AWD N2O: ( 0.229 + 0.137 + 0.40 + 1.05 + 0.198 + 0.329) / 6 = 0.3905	Yield AWD: (9.73 + 8.97) / 2 = 9.35
Effects of water-saving irrigation practices and drought resistant rice variety on greenhouse gas emissions from a no-till paddy in the central lowlands of China	China (2015)	https://doi.org/10.1016/j.scitotenv.2014.10.073	Xu	CH4, N2O, CO2	937	266.75	7.2	9.93	27264.6	9913.14	7.46	6.71	3654.77	1477.37	-0.63641	-0.59577	-0.100536	Conventional and AWD	24% reduction in Carbon Dioxide equivalent seasonal emissions	9.1% reduction in yield	Reduction of 15.4% in growing season Carbon Dioxide equivalent emissions per kg of rice produced.	Table 4 and 5	Calculated average of 2 irrigation regimes. Similar % changes to other studies but different absolute numbers.	AWD CH4: (365 + 379 + 176 + 147) / 4 = 266.75	AWD N2O: (9.2 + 10.2 + 10.3 + 10) / 4 = 9.93	Conventional CH4: (955 + 919)/2 = 937	Conventional N2O: (8.2 + 6.2) / 2 = 7.2	Conventional yield: (7.38 + 7.54) / 2 = 7.46	AWD yield: (7.31 + 6.57 + 6.62 + 6.33) / 4 = 6.71
Mitigation of yield-scaled greenhouse gas emissions in subtropical paddy rice under alternative irrigation systems	Brazil (2016)	https://doi.org/10.1007/s10705-016-9775-0	Zschornac	CH4, N2O	424	225	0.393	3.834	11555.3	7121.68					-0.383686	n/a	n/a	Conventional and AWD (Intermittent Irrigation)	74% reduction in Carbon Dioxide equivalent seasonal emissions	Not statistically significant	No change in yield, so reduction in emissions per kg of rice produced is 74%.	Page 9 - table 4	Data only used for GS1 as AWD types changed between season. Per season emissions.
Alternate wetting and drying in high yielding direct-seeded rice systems accomplishes multiple environmental and agronomic objectives	USA (2016)	https://doi.org/10.1016/j.agee.2016.05.020	LaHue	CH4, N2O	175	56.35	0.102	0.379	4752.85	1624.92	9.41	10.21	505.085	159.15	-0.658117	-0.684905	0.0850159	Conventional and AWD	57–74% in annual Carbon Dioxide equivalent emissions	Average increase of 5.1%	59–88% reduction in growing season Carbon Dioxide Equivalent emissions per kg of rice produced.	Table 2 and table 3	Averaged 2 types of AWD. Yields from 2013, 2014 as these years used for GHG measurement.	AWD CH4: (74.5 + 38.2) / 2 = 56.35	AWD N2O: (0.142 + 0.616) / 2 = 0.379	Yield avg conventional: (10.7 + 8.12) / 2 = 9.41	Yield avg AWD: (10.1 + 9.24 + 10.7 + 10.8) / 4 = 10.21
Grain yield, water productivity and Methane emission of irrigated rice in response to water management in south China	China (2016)	https://doi.org/10.1016/j.agwat.2015.10.015	Liang	CH4	153.5	63.25			4144.5	1707.75	6.844	6.98	605.567	244.663	-0.587948	-0.595976	0.0198714	Conventional and AWD	58.8% reduction in Methane emissions. Nitrous Oxide emissions not measured.	No statistically significant change in yield	58.8% reduction in Methane emissions per kg of rice produced	Table 2	Averages calculated for AWD15 and AWD30.	AWD yield: (7265 + 6695) / 2 = 6980	AWD CH4: (63 + 63.5) / 2 = 63.25
Sobering Rice Production from Conventional to Climate Smart	India (2017)	https://doi.org/10.20546/ijcmas.2017.609.345	Rajesh Krishnan	CH4, N2O, CO2	61.69	36.27	0.3317	0.3414	1756.18	1072.49	3.25	3.6	540.364	297.915	-0.389305	-0.448678	0.107692	Conventional and AWD	38.5% reduction in Carbon Dioxide equivalent emissions per season	9.9% increase in yield	44.1% reduction in Carbon Dioxide equivalent emissions per kg of rice produced
Intercontinental comparison of greenhouse gas emissions from irrigated rice fields under feasible water management practices: Brazil and Japan	Brazil, Japan (2018)	https://doi.org/10.1080/00380768.2017.1415660	Carmargo	CH4, N2O	693.67	281	-0.03	0.35	18720.9	7682.55	8.29	9	2258.25	853.617	-0.589627	-0.622001	0.0856454					Table 3	For Brazil, averaged MI and SI for AWD. For Japan, averaged MD values and CF values. Also averaged between countries.	Conventional CH4: (623 + 738 + 720) / 3 = 693.67	Conventional N2O: (0.32 + -0.24 + -0.17) / 3 = -0.03	AWD CH4: (466 + 237 + 262 + 159) / 4 = 281	AWD N2O: (0.56 + 1.16 + -0.23 + -0.09) / 4 = 0.35	Conventional yield: (9.39 + 8.06 + 7.41) / 3 = 8.29	AWD yield: (10059+10231+7328+8390) / 4 = 9.00
Effects of alternate wetting and drying technique on greenhouse gas emissions from irrigated rice paddy in Central Luzon, Philippines	Philippines (2018)	https://doi.org/10.1080/00380768.2017.1401906	Sibayan	CH4, N2O	199.4	204.78	1.05	1.82	5670.45	6025.92	6.16	6.26	920.528	962.607	0.0626881	0.0457123	0.0162338					Table 2	AWD and AWDS averaged. Dry season and wet season also averaged.	AWD CH4: (42.2 + 52.8 + 350.1 + 374) / 4 = 204.78	Conventional CH4: (69.9 + 328.9) / 2 = 199.4	AWD N2O: (3.5 + 0.633 + 2.63 + 0.528) / 4 = 1.82	Conventional N2O: (1.6 + 0.509) / 2 = 1.05	Conventional yield: (6.9 + 5.41) / 2 = 6.16	AWD yield: (6.88 + 5.83 + 6.9 + 5.42) / 4 = 6.26
Impacts of alternate wetting and drying on greenhouse gas emission from paddy field in Central Vietnam	Vietnam (2018)	https://doi.org/10.1080/00380768.2017.1409601	Tran	CH4, N2O	572	421.25	0.49	0.36	15577.8	11472	4.43	4.75	3516.43	2415.16	-0.263564	-0.313177	0.0722348					Table 3	AWD and AWDS averaged. Dry season and wet season also averaged.	AWD CH4: (351+491+353+490) / 4 = 421.25	AWD N2O: (0.208 + 0.574 + 0.206 + 0.455) / 4 = 0.36	Conventional CH4: (500 + 644) / 2 = 572	Conventional N2O : (0.281 + 0.698) / 2 = 0.49	Conventional yield: (4.41 + 4.44) / 2 = 4.43	AWD yield: (4.89 + 4.67 + 4.84 + 4.6) / 4 = 4.75
Site-specific feasibility of alternate wetting and drying as a greenhouse gas mitigation option in irrigated rice fields in Southeast Asia: a synthesis	SE Asia (2018)	https://doi.org/10.1080/00380768.2017.1409602	Tirol-Padre	CH4, N2O	309.95	266.31	0.78	1.06	8581.59	7479.75	5.26	5.41	1631.48	1382.58	-0.128396	-0.152562	0.0285171					Table 3	Absolute values for AWD calculated from % change values in the table.	AWD CH4: (370.61 + 490.96 + 243.82 + 325.73 + 9.22 + 47.5 + 375.33) / 7 = 266.31	AWD N2O : (0.21 + 0.52 + 0.7 + 1.27 + 1.16 + 3.06 + 0.53) / 7 = 1.06	AWD yield: (4.86 + 4.64 + 5.08 + 6.77 + 4.05 + 6.89 + 5.51) / 7 = 5.41	Conventional CH4: (499.5 + 644.2 + 385.3 + 515.4 + 13.4 + 23 + 69.9 + 328.9) / 8 = 309.95	Conventional N2O: (0.28 + 0.7 + 0.81 + 1.13 + 0.97 + 0.22 + 1.6 + 0.51) / 8 = 0.78	Conventional yield: (4.41 + 4.44 + 5.12 + 6.87 + 4.64 + 4.28+6.9 + 5.41) / 8 = 5.26
Alternate wetting and drying reduces methane emission from a rice paddy in Central Java, Indonesia without yield loss	Indonesia (2018)	https://doi.org/10.1080/00380768.2017.1409600	Setyanto	CH4, N2O	450	284.75	0.97	0.99	12414.8	7958.52	6	5.92	2069.13	1344.34	-0.35895	-0.350287	-0.0133333					Table 3	AWD and AWDS averaged. Dry season and wet season also averaged	Conventional CH4: (385 + 515) / 2 = 450	Conventional N2O: (0.810 + 1.13) / 2 = 0.97	Conventional yield (5.12 + 6.87) / 2 = 6.00	AWD CH4: (243 + 341 + 244 + 311) / 4 = 284.75	AWD N2O: (0.711 + 1.32 + 0.690 + 1.22) / 4 = 0.99	AWD yield: (5.2 + 6.87 + 4.96 + 6.67) / 4 = 5.92
Evaluating the effects of alternate wetting and drying (AWD) on methane and nitrous oxide emissions from a paddy field in Thailand	Thailand (2018)	https://doi.org/10.1080/00380768.2017.1399044	Chidthaisong	CH4, N2O	17.3	14.9	0.79	0.915	682.77	652.095	4.5	4.32	151.727	150.948	-0.0449273	-0.00513258	-0.04					Table 3	AWD and AWDS averaged.	AWD CH4: (8.8 + 21) /2 = 14.9	AWD N2O: (0.979 + 0.851) / 2 = 0.915	AWD yield: (4.19 + 4.44) / 2 = 4.32
Methane and nitrous oxide emissions from conventional and modified rice cultivation systems in South India	India (2018)	https://doi.org/10.1016/j.agee.2017.10.014	Oo	CH4, N2O	126.7	86.23	1.04	1.62	3704.82	2770.47	6.33	6.85	585.28	404.448	-0.252198	-0.308966	0.0821485	Conventional and AWD	26.7% reduction in Carbon Dioxide equivalent emissions.	7.1% increase with AWD	31.6% reduction in Carbon Dioxide equivalent emissions per kg of rice produced	Table 2 and 3	Only YW-AWD used for AWD calculations as IB-AWD is betweeen CRC and AWD. Values averaged across season and variety.	AWD CH4: (60 +51.7 +119.7 + 113.5) /4 = 86.23	Conventional CH4: (99.4 + 88.9 + 154 + 164.5) / 4 = 126.7	AWD N2O: (1.94 + 2.09 + 1.28 + 1.15) / 4 = 1.62	Conventional N2O: (1.45 + 1.36 + 0.61 + 0.73) / 4 = 1.04	Yield AWD: ( 7 + 7.2 + 6.4 + 6.8) /4 = 6.85	Yield conventional: (6.7 + 6.9 + 6.4+ 5.3) / 4 = 6.33
Reducing greenhouse gas emissions and grain arsenic and lead levels without compromising yield in organically produced rice	Philippines (2020)	https://doi.org/10.1016/j.agee.2020.106922	Faiz-ul Islam	CH4, N2O	112.06	30.51	0.46	1.02	3151.2	1102.23	5.97	6.32	527.839	174.403	-0.650219	-0.66959	0.0586265	Conventional and AWD	66% reduction in Carbon Dioxide equivalent seasonal emissions	5.9% increase in yield with AWD	67.2% reduction in Carbon Dioxide equivalent emissions per kg of rice produced with AWD.	Table 3	Used average of fertiliser treatments.	CF CH4: (256.1 + 122.5 + 217.6 + 115.6 + 66.4 + 86.7 + 31.7 + 74.3 + 37.6) / 9 = 112.06	CF N2O: ((0.64 + 0.22 + 0.42 + 0.47 + 0.53 + 0.42 + 0.38 + 1.19 - 0.17) /9) = 0.46	AWD CH4: (75.2 + 29.2 + 33.6 + 27.5 + 18.8 + 25.5 + 15.6 + 32.5 + 16.7) / 9 = 30.51	AWD NO2: (0.79 + 0.9 +0.58 + 1.84 + 1.02 + 0.91 +1.05 + 1.61 + 0.45) / 9 = 1.02	CF yield: (5.5 + 5.9 + 6.3 + 3.3 + 5.7 + 7.1 + 6.1+ 6.9 + 6.9) / 9 = 5.97	AWD yield: (5.8 + 6.5 + 6.6 + 2.8 + 6.4 + 7.5 + 7.1 + 7.5 + 6.7) / 9 = 6.32
1.1	10232							Median	5211.65	4397.94	6.16	6.32	605.567	425.397	-0.386496	-0.448678	0.0267516
2.8	13981							Mean	8482.76	4730.21	6.49893	6.61933	1314.49	752.812	-0.406175	-0.422418	0.0236533
0.392857	0.73185							Max	27264.6	11472	10.26	10.21	3654.77	2415.16	0.0626881	0.0457123	0.107692
0.607143	0.26815							Min	682.77	303.976	3.25	3.6	151.727	32.5109	-0.893096	-0.882692	-0.100536

## Sheet: T3. SRI vs AWD
					Methane (kg/ha)		Nitrous oxide (kg/ha)		Net GHG (CO2e kg/ha)		Yield (t/ha)		GHG intensity (t CO2e/t rice)		𝚫 from AWD to SRI (%)
Source Title	Place/date	Source (DOI/Link)	Reference	Gases reported	AWD	SRI	AWD	SRI	AWD	SRI	AWD	SRI	AWD	SRI	CO2e/ha	GHG/t rice	Yield	Cultivation Methods Investigated	Emissions Change (per hectare)	Yield Changes	Emissions change (per kilogram of rice produced)	Data Location	Notes	Extra Calculations
Sobering Rice Production from Conventional to Climate Smart	India (2017)	https://doi.org/10.20546/ijcmas.2017.609.345	Rajesh Krishnan	CH4, N2O, CO2	36.27	34.41	0.3414	0.3408	1072.49	1022.11	3.6	4.92	297.915	207.746	-0.0469782	-0.302667	0.366667	Conventional and AWD	84.3% decrease in seasonal Carbon Dioxide equivalent emissions	8.5% reduction in yields.	82.8% reduction in Carbon Dioxide equivalent emissions per kg of rice produced.	Tables 2, 3, 6
Multi-criteria assessment to screen climate smart rice establishment techniques in coastal rice production system of India	India (2023)	https://doi: 10.3389/fpls.2023.1130545	Mohapatra	CH4, N2O, CO2	65.98	63.1	1.47	1.28	2182.77	2053.14	4.68	5.47	466.404	375.346	-0.0593878	-0.195235	0.168803					Tables 3, 5	Data averaged across Rabi seasons of 2020 and 2021. AWD values average of TPR-AWD and DSR-AWD.	AWD CH4: (63.2 + 65.6 + 66.9 + 68.2) / 4 = 65.98	AWD N2O: (1.46 + 1.47 + 1.46 + 1.48) / 4 = 1.47	AWD yield : ( 4.52 + 4.65 + 4.72 + 4.82) / 4 = 4.68	SRI CH4: (62.6 + 63.6) / 2 = 63.1	SRI N2O: (1.22 + 1.33) / 2 = 1.28	SRI yield: (5.41 + 5.53) / 2 = 5.47
								Mean	1627.63	1537.62	4.14	5.195	382.159	291.546	-0.053183	-0.248951	0.267735
								Max	2182.77	2053.14	4.68	5.47	466.404	375.346	-0.0469782	-0.195235	0.366667
								Min	1072.49	1022.11	3.6	4.92	297.915	207.746	-0.0593878	-0.302667	0.168803
